## Abstract

The brain is possibly the most complex system known to mankind, and its complexity has been called upon to explain the emergence of consciousness. However, complexity can take many forms: here, we investigate measures of algorithmic and process complexity in both the temporal and topological dimension, testing them on functional MRI data obtained from individuals undergoing various levels of sedation with the anaesthetic agent propofol, in two separate datasets. We demonstrate that the various measures are differently able to discriminate between levels of sedation, with temporal measures showing higher sensitivity. Further, we show that all measures are strongly related to a single underlying construct explaining most of the variance, as assessed by Principal Component Analysis, which we interpret as a measure of overall complexity of our data. This overall complexity was also able to discriminate between levels of sedation, supporting the hypothesis that consciousness is related to complexity - independent of how the latter is measured.

## 1 Introduction

The science of complex systems has gained increasing prominence in the 21st century. It combines the reductionist ideal of science, with the notion of emergence, whereby high-level phenomena can result from the interactions of simple constituent parts, confirming Aristotle's saying that the whole is more than the sum of its parts [1]. However, complexity science is also a discipline still in its infancy. In particular, due to its appealing and apparently intuitive nature, the notion of complexity has remained relatively ill-defined. The interdisciplinary nature of this science has resulted in different fields applying the term complexity to multiple quantities, variously measured. Complexity is perhaps best understood as the negation of simplicity. A system exhibits complex behaviour when it is not uniform, stereotyped, or predictable. However, there is a key assumption that this is not sufficient: complexity must emerge from the underlying orderly interactions of a system's components, about which its behaviour must provide information - in other words, its unpredictability must be more than mere randomness, but rather the result of interesting behaviours emerging. Thus, a complex system lies between complete order - such as the perfectly predictable regularity of a crystal - and complete disorder, as exhibited for instance by the random motion of molecules of

50 a gas. Complexity can be identified in more than one dimension of the same system, too. It may  
51 be due to the structure of the interactions between components, such as the connections in a social  
52 or biological network. Or it may only become apparent over time, as when it is applied to signals  
53 and temporal patterns. Furthermore, there are different ways in which something can be said to be  
54 complex, reflected in the different ways that have been developed to estimate complexity. On the  
55 one hand, methods from algorithmic information theory such as Shannon entropy and Lempel-Ziv  
56 compressibility [2, 3] emphasise unpredictability as the key property for complexity. One downside of  
57 such approach, however, is that they would treat a purely random sequence as maximally complex.  
58 Alternatively, methods from the physics of dynamical systems focus on the aspect of interactions  
59 in the process whether between the system's elements (e.g. synchronisability; [4]), between its  
60 present and past states (e.g. Hurst exponent; [5]), or between different scales [6]. In this work,  
61 we aim to explore the relation between algorithmic and process measures of complexity, in both  
62 the topological and temporal dimensions. We choose to test these measures on a paradigmatically  
63 complex system: the human brain. Not only is the brain the source of humans' widely diverse  
64 range of behaviours and accomplishments, which is itself suggestive of a highly complex underlying  
65 organisation; its structure is also that of a complex network of subnetworks, in turn made of multiple  
66 kinds of neurons obeying nontrivial plasticity rules for their interactions. For these reasons, it has  
67 been proposed that the brain's complexity may explain another unique property it possesses: con-  
68 sciousness. Recent scientific theories of consciousness have emphasised, in one way or another, the  
69 brain's complexity as a crucial requirement for consciousness [7, 8, 9, 10]. Anaesthetic drugs such as  
70 the GABA-ergic agonist propofol provide a way to controllably and reversibly modulate the brain's  
71 state of consciousness. Its complexity, in various aspects, may then be assessed based on signals  
72 from noninvasive neuroimaging techniques. In particular, functional MRI (fMRI) has the advantage  
73 of providing high spatial resolution, thus allowing for estimation of the brain's network properties in  
74 greater detail than afforded by other methods such as EEG. Here, we chose to evaluate measures of  
75 algorithmic and process complexity applied to the temporal and topological (network) dimensions,  
76 derived from fMRI blood-oxygen-level-dependent (BOLD) signals of volunteers undergoing sedation  
77 with propofol, in order to investigate the relationship between the different measures of complexity,  
78 as well as determining whether they can be related to different levels of consciousness. We also

79 replicated our results in an independent dataset of propofol anaesthesia, in order to demonstrate  
80 their robustness.

## 81 **2 Methods**

### 82 **2.1 Data Acquisition & Preprocessing**

#### 83 **2.1.1 Dataset A**

84 Twenty-five healthy volunteer subjects were recruited for scanning. The acquisition procedures are  
85 described in detail by Stamatakis et al, [11]: MRI data were acquired on a Siemens Trio 3T scanner  
86 (WBIC, Cambridge). Each functional BOLD volume consisted of 32 interleaved, descending, oblique  
87 axial slices, 3 mm thick with interslice gap of 0.75 mm and in-plane resolution of 3 mm, field of view  
88 = 1926192 mm, repetition time = 2 s, acquisition time = 2 s, time echo = 30 ms, and flip angle 78.  
89 We also acquired T1-weighted structural images at 1 mm isotropic resolution in the sagittal plane,  
90 using an MPRAGE sequence with TR = 2250 ms, TI = 900 ms, TE = 2.99 ms and flip angle =  
91 9u, for localization purposes. Of the 25 healthy subjects, 14 were ultimately retained: the rest were  
92 excluded, either because of missing scans (n=2), or due of excessive motion in the scanner (n=9,  
93 5mm maximum motion threshold).

94

#### 95 **Propofol Sedation**

96 Propofol was administered intravenously as a target controlled infusion (plasma concentration mode),  
97 using an Alaris PK infusion pump (Carefusion, Basingstoke, UK). Three target plasma levels were  
98 used - no drug (baseline), 0.6 mg/ml (mild sedation) and 1.2 mg/ml (moderate sedation). A period  
99 of 10 min was allowed for equilibration of plasma and effect-site propofol concentrations. Blood sam-  
100 ples were drawn towards the end of each titration period and before the plasma target was altered,  
101 to assess plasma propofol levels. In total, 6 blood samples were drawn during the study. The mean  
102 (SD) measured plasma propofol concentration was 304.8 (141.1) ng/ml during light sedation, 723.3  
103 (320.5) ng/ml during moderate sedation and 275.8 (75.42) ng/ml during recovery. Mean (SD) total  
104 mass of propofol administered was 210.15 (33.17) mg, equivalent to 3.0 (0.47) mg/kg. The level of

105 sedation was assessed verbally immediately before and after each of the scanning runs. The three  
106 conditions from this dataset are referred to as Awake, Mild and Moderate sedation respectively.

### 107 **2.1.2 Dataset B**

108 These data were generously provided by the Brain and Mind Institute, Department of Psychology,  
109 The University of Western Ontario. Sixteen healthy volunteer subjects were recruited for scanning.  
110 Scanning was performed using a 3 Tesla Siemens Tim Trio system with a 32-channel head coil, at  
111 the Robarts Research Institute in London, Ontario, Canada. Participants lay supine in the scanner.  
112 Function echo-planar images (EPI) were acquired (33 slices, voxel size: 3 x 3 x 3mm; inter-slice gap  
113 of 25%, TR=2000ms, TE=30ms, matrix size=64x64, FA=75 degrees). An anatomical volume was  
114 obtained using a T1-weighted 3D MPRAGE sequence (32 channel coil, voxel size: 1x 1 x 1mm, TA=  
115 5 min, TE=4.25ms, matrix size=240x256, FA=9 degrees).

116

### 117 **Propofol Sedation**

118 Intravenous propofol was administered with a Baxter AS 50 (Singapore). The infusion pump was  
119 manually adjusted using step-wise increases to achieve desired levels of sedation of propofol (Ram-  
120 say level 5). Concentrations of intra-venous propofol were estimated using the TIVA Trainer (the  
121 European Society for Intravenous Anaesthesia, eurosiva.eu) pharmacokinetic simulation program.  
122 If Ramsay level was lower than 5, the concentration was slowly increased by increments of 0.3  $\mu\text{g}/\text{ml}$   
123 with repeated assessments of responsiveness between increments to obtain a Ramsay score of 5.  
124 Ramsay level 5 was determined as being unresponsive to verbal commands and rousable only by  
125 physical stimulus. In contrast to Propofol Dataset A, the two conditions from this dataset are re-  
126 ferred to by Awake and Deep sedation respectively, reflecting the substantial increase in sedation  
127 depth present in this dataset.

### 128 **2.1.3 Image Pre-Processing**

129 All of the collected images were preprocessed using the CONN functional connectivity toolbox  
130 [12]<sup>1</sup>, using the default pre-processing pipeline, which includes realignment and unwarping (motion

---

<sup>1</sup><http://www.nitrc.org/projects/conn>

131 estimation and correction), slice-timing correction, outlier detection, structural coregistration and  
132 spatial normalisation using standard grey and white matter masks, normalization to the Montreal  
133 Neurological Institute space (MNI), and finally spatial smoothing with a 6mm full width at half-  
134 maximum (FWHM) Gaussian kernel.

135 Temporal preprocessing included nuisance regression using anatomical CompCor to remove noise  
136 attributable to white matter and CSF components from the BOLD signal, as well as subject-specific  
137 realignment parameters (three rotations and three translations) and their first-order temporal deriva-  
138 tives [13]. Linear detrending was also applied, as well as band-pass filtering in the default range of  
139 [0.008, 0.09] Hz [14]. For a more detailed discussion of the details of the CONN default preprocessing  
140 pipeline, see Whitefield-Gabrieli and Nieto-Castanon, 2012.

## 141 **2.2 Complexity of BOLD Signals**

142 To explore the space of different formalizations of complexity, we used algorithms from algorithmic  
143 information theory (Lempel-Ziv compressibility, sample entropy, and principal component analysis),  
144 as well as from dynamical systems physics (Higuchi fractal dimension, Hurst exponent). Before  
145 analysis, the BOLD time-series were transformed by applying the Hilbert transform. The absolute  
146 value of the transformed signal was then taken, to remove negative frequencies and ensure that all  
147 series were positive. The Hilbert transform was also used to maintain consistency with earlier studies  
148 exploring the complexity of brain activity as it relates to consciousness [15, 16].

### 149 **2.2.1 Lempel-Ziv Complexity**

150 The Lempel-Ziv algorithm is a computationally tractable method for quantifying the complexity of  
151 a data-series by calculating the number of distinct patterns present in the data. For sufficiently large  
152 datasets, it is a useful approximation of Kolmogorov complexity, which is famously uncomputable  
153 for most strings [2]. The method used here is described in Shartner et al., (2015). Briefly: for every  
154 ROI in our parcellated brain, a time-series  $F(t)$  is binarized according to the following procedure:

$$F_B(t_i) = \begin{cases} 1, & \text{if } F(t_i) \geq \text{mean}(F(t)) \\ 0, & \text{otherwise} \end{cases}$$

155 The resulting time-series are stacked into a binary matrix  $M(X, T)$ , where every row corresponds  
156 to the time-series  $F_B(t)$  for every ROI  $x \in X$  and every column is a time-point  $t \in T$ . The matrix is  
157 then flattened orthogonally to  $T$ , resulting in a vector  $V$  of length  $X \times T$ , on which the Lempel-Ziv  
158 analysis was performed.

159 The Lempel-Ziv algorithm creates a dictionary  $D$ , which is the set of binary patterns that make  
160 up  $V$  and returns a value  $LZ_C \propto |D|$ . For every time-series  $F_B(t) \in X$ , a random time-series was  
161 created, by shuffling all the entries in  $F(t)$ . These were stacked into a binary matrix  $M_{rand}$ , with the  
162 same dimensions as  $M$ , however containing only noise. This random matrix was flattened and its  
163  $LZ_C$  value calculated. As the randomness of a string increases,  $LZ_C \rightarrow 1$ , so this value was used to  
164 normalize the "true" value of  $LC_C$ , which was divided by  $LZ_{C_{Rand}}$  to ensure all values were within  
165 a range  $(0, 1)$ .

### 166 2.2.2 Sample Entropy

167 Sample Entropy (SampEn) quantifies how unpredictable a signal is [3] by estimating the probability  
168 that similar sequences of observations in a timeseries will remain similar over time. To compute  
169 SampEn, each time-series  $X(t)$  of length  $N$  is divided into subsections  $S$  of length  $m$  and the  
170 Chebychev distance between two sections  $S_i, S_j$  is calculated. Two sections are "similar" if their  
171 distance is less than some tolerance  $r$ . The procedure is repeated for sections of length  $m + 1$ . We  
172 then calculate the probability that, if two data sequences of length  $m$  have distance less than  $r$ , then  
173 the same two sequences of length  $m + 1$  also have distance less than  $r$ .

$$SampEn = -\log \frac{A}{B}$$

174 Where  $A$  is the number of chunks of length  $m + 1$  that are similar (have Chebyshev distance less  
175 than  $r$ ), and  $B$  is the number of chunks of length  $m$  that are similar. Low values of SampEn would  
176 indicate that the signal is highly stereotyped - with a perfectly predictable series, such as  $[1,1,1, \dots]$   
177 having a SampEn of zero, and SampEn increasing as the series becomes more disordered.

178 SampEn depends on the choice of parameters  $m$  and  $r$ . Here, we used  $m = 2$  and  $r = 0.3 \times$   
179  $\sigma(X(t))$ , where  $\sigma()$  is the standard deviation function.

180 SampEn has been used to test the level of sedation induced by propofol and remifentanyl in  
181 electrophysiological studies (Ferenets et al., 2007), and been shown to be associated with the degree  
182 of sedation much like Lempel-Ziv complexity has.

### 183 2.2.3 Hurst Exponent

184 The Hurst Exponent returns an estimate of how predictable a time-series is by quantifying its  
185 'memory,' or how dependent the value at time  $t$  is on the value at time  $t - 1$  [5]. There are a number  
186 of algorithms for estimating the Hurst Exponent; here we report results calculated using a rescaled  
187 range approach. In it, a time-series  $X(t)$  of length  $N$  is segmented into non-overlapping sections of  
188 length  $n$ ,  $X_i(t)$ . For each segment, the cumulative departure from the signal mean is calculated:

$$X'_i(t) = \sum_{t=0}^n x_t - \bar{x}$$

189 where  $\bar{x}$  is the mean of  $X_i(t)$ . The rescaled range of deviations ( $R/S$ ) is then defined as:

$$\frac{R}{S} = \frac{\max(X'_i(t)) - \min(X'_i(t))}{\sigma(X_i(t))}$$

190 where  $\sigma()$  is the standard deviation function. We then compute  $R/S$  for all  $X_i(t)$  and average  
191 them, generating  $(R(n)/S(n))$ , which is the average scaled range for all the subsections of  $X(t)$  with  
192 length  $n$ . We are left with a power relation, where:

$$\frac{R(n)}{S(n)} \propto n^{-H}$$

193 Where  $H$  is the Hurst exponent, and can be extracted by regression.

### 194 2.2.4 Higuchi Fractal Dimension

195 To calculate the temporal fractal dimension, we used the Higuchi method for calculating the self-  
196 similarity of a one-dimensional time-series [6], an algorithm widely used in EEG and MEG analysis  
197 [17]. From each time-series  $X(t)$ , we create a new time-series  $X(t)_k^m$ , defined as follows:



$$X(t)_k^m = x_m, x_{m+k}, x_{m+2k}, \dots, x_{m+\lfloor \frac{N-m}{k} \rfloor k}$$

198 where  $m = 1, 2, \dots, k$ .

199 For each time-series  $X(t)_k^m$  in  $k_1, k_2, \dots, k_{max}$ , the length of that series,  $L_m(k)$ , is given by:

$$L_m(k) = \frac{(\sum_{i=1}^{\lfloor \frac{N-m}{k} \rfloor} |x_{im+k} - x_{(i-1)k}|)^{\frac{N-1}{\lfloor \frac{N-m}{k} \rfloor k}}}{k}$$

200 We then define the average length of the series  $\langle L(k) \rangle$ , on the interval  $[k, L_m(k)]$  as:

$$\langle L(k) \rangle = \sum_{m=1}^k \frac{L_m(k)}{k}$$

201 If our initial time-series  $X(t)$  has fractal character, then:

$$\langle L(k) \rangle \propto k^{-D}$$

202 Where  $D$  is our desired fractal dimension. The Higuchi algorithm requires a pre-defined  $k_{max}$   
 203 value as an input, along with the target time-series. This value is usually determined by sampling  
 204 the results returned by different values of  $k_{max}$  and selecting a value based on the range of  $k_{max}$   
 205 where the fractal dimension is stable. For both datasets, we sampled over a range of powers of  
 206 two (2, ..., 128). Due to the comparably small size of BOLD time-series, the range of  $k_{max}$  values  
 207 that our algorithm could process without returning an error was limited. We ultimately decided on  
 208  $k_{max} = 32$  for Dataset A and  $k_{max} = 64$  for the Dataset B.

### 209 2.2.5 PCA of BOLD Signals

210 Principal component analysis (PCA) is commonly used to compress data by finding the dimensions  
 211 that encode the maximal variance in a high-dimensional dataset. Here, we use PCA in a matter  
 212 similar to Lempel-Ziv complexity, to relate the complexity of sets of BOLD signals to their compress-  
 213 ibility. The more algorithmically random the dataset, the more orthogonal dimensions are required  
 214 to describe the dataset, which we took advantage of to attempt to quantify the complexity of our  
 215 BOLD time-series data. We constructed a large array of un-binarized BOLD signals,  $M(X, T)$  to

216 which we applied a standard feature scaler from Scikit-Learn [18] to ensure all values had a mean  
217 of zero and unit variance, and then a PCA function, recording recorded how many dimensions were  
218 required to cumulatively describe 95% of the variance in the original dataset. We used this value as  
219 our measure of data complexity.

## 220 **2.3 Complexity of Functional Connectivity Graphs**

221 Networks are a common example of complex system, and perhaps none more so than the human  
222 brain, which can be considered as a network at multiple scales. A network, or graph, is represented  
223 mathematically as an object comprised of nodes (in this case, cortical regions) and the connections  
224 between them, or edges (in this case, functional connectivity given by statistical association of  
225 the regions' BOLD time-series). Investigating how the complexity of brain functional networks is  
226 affected by the anaesthetic drug propofol is therefore a clear way of testing our hypothesis that loss  
227 of consciousness should reduce the brain's level of complexity.

### 228 **2.3.1 Formation of Functional Connectivity Networks**

229 To construct brain functional connectivity networks, the preprocessed BOLD time-series data were  
230 extracted from each brain in CONN and the cerebral cortex was segmented into distinct ROIs,  
231 using the 234-ROI parcellation of the Lausanne atlas [19]. Each time-series  $F(t)$  was transformed  
232 by taking the norm of the Hilbert transform, to maintain consistency with the time-series analysis.

$$H(t) = |\text{Hilbert}(F(t))|$$

233 Every time-series  $H(t)$  was then correlated against every other time-series, using the Pearson  
234 Correlation, forming a matrix  $M$  such that:

$$M_{ij} = \rho(H_i(t), H_j(t))$$

235 The matrices were then filtered to remove self-loops, ensuring simple graphs, and all negative  
236 correlations were removed:

$$M_{ij} = \begin{cases} 0, & \text{if } i = j \\ 0, & \text{if } M_{ij} < 0 \\ M_{ij}, & \text{otherwise} \end{cases}$$

237 Finally, the matrices were binarized with a  $k\%$  threshold, such that:

$$M_{ij} = \begin{cases} 1, & \text{if } M_{ij} \geq P_k \\ 0, & \text{otherwise} \end{cases}$$

238 The results could then be treated as adjacency matrices defining functional connectivity graphs,  
239 where each row  $M_i$  and column  $M_j$  corresponds to an ROI in the initial cortical parcellation, and  
240 their connection being represented by the corresponding cell in the matrix. For each graph theoretical  
241 analysis, a range of percentage thresholds ( $k\%$ ) were tested to ensure that any observed effects were  
242 not an artefact of one particular threshold, and are consistent over different graph topologies.

### 243 **2.3.2 Algebraic Connectivity**

244 Algebraic connectivity (AC) is a measure of graph connectivity derived from spectral graph theory  
245 [4], which gives an upper bound on the classical connectivity of a graph. As such, it is often used as a  
246 measure of how well-integrated a graph is and how robust it is to damage, in the sense of the number  
247 of connections that must be removed before it is rendered disconnected. Unlike classical connectivity,  
248 which must be calculated by computationally intensive brute-force methods, AC is quite easy to  
249 find for even quite large graphs. AC is also a measure of graph synchronizability and emerges  
250 from analysis of the Kuramoto model of coupled oscillators [20]. For a simple example, imagine  
251 placing identical metronomes at every vertex of a graph and allowing the vibrations to propagate  
252 along the edges. The synchronizability describes the limit behaviour of how long it will take all the  
253 metronomes to synchronize. Here we use AC as a proxy measure of synchronisability to capture the  
254 possible temporal dynamics of the brain networks modelled by our functional connectivity graphs.

255 The AC of a graph  $G$  is formally defined as the first non-zero eigenvalue of the Laplacian matrix  
256  $L_G$  associated with  $G$ .  $L_G$  is derived by subtracting the adjacency matrix  $A_G$  from the degree matrix

257  $D_G$ :

$$L_G = D_G - A_G$$

258 As every row and column of  $L_G$  sum to zero, and it is symmetric about the diagonal, the  
259 imaginary part of every eigenvalue in the spectrum of  $L_G$  is zero, and if  $G$  is a fully-connected  
260 graph, then:

$$0 = \lambda_1 \leq \lambda_2 \leq \lambda_3 \leq \dots \leq \lambda_{max}$$

261 To ensure that we were capturing the full topology of the graph, we calculated  $\lambda_2$  for each graph  
262 at multiple thresholds [10, 20, 30, ... 90], creating a curve  $\Lambda = [\lambda_{2_{10}}, \lambda_{2_{20}}, \lambda_{2_{30}} \dots \lambda_{2_{90}}]$ . We then  
263 integrated  $\Lambda$  using the trapezoid method to arrive at our final value  $AC = \int \Lambda dx$ .

### 264 **2.3.3 Graph Compressibility**

265 In contrast to AC, which we use to explore the limit behaviour of possible brain temporal dynamics,  
266 our measure of graph compressibility is purely algorithmic, and estimates the Kolmogorov complexity  
267 of a graph: that is, the size of a computer program necessary to fully recreate a given graph  $G$ . To  
268 do this, we re-employ the Lempel-Ziv algorithm originally used to calculate the  $LZ_C$  score of BOLD  
269 signals. Here we use it to calculate a related measure,  $LZ_G$ , which is the length of a dictionary  
270 required to describe the adjacency matrix  $A_G$  of a given graph.

271 To calculate  $LZ_G$ , we take a binary adjacency matrix and flatten it into a single vector  $V$ , and  
272 then run the Lempel-Ziv algorithm on that vector. As a binary vector of length  $l$  can be used to  
273 perfectly reconstruct an adjacency matrix defining a graph with  $\sqrt{l}$  vertices (so long as  $l$  is a square  
274 number, of course), we take  $V$  to be equivalent to a program defining  $G$ . As with AC, to ensure that  
275 we were capturing the full topology of  $G$ , we calculated the Lempel-Ziv complexity of the binary  $A_G$   
276 at the same nine thresholds [10...90], and then defined  $LZ_G$  as the integral of the resulting curve of  
277 complexity values.

## 278 **2.4 Higher-Order Measures**

279 Once we had calculated individual measures of complexity, we tested how they related to each-other,  
280 and (for Dataset A) serum concentrations of propofol. We correlated each one against all others to  
281 construct a correlation matrix which describes, how different metrics cluster.

282 We also did a principal component analysis on the set of all results. We hypothesized that,  
283 despite variability in the effectiveness of the individual measures, there should be a single, underlying  
284 component reflecting a shared factor of "complexity". We further hypothesised that this underlying  
285 factor should be predictive of both the level of consciousness, and (in Dataset A), of the individual  
286 serum concentration of propofol.

## 287 **2.5 Statistical Analysis**

288 All analysis was carried out using the Python 3.6 programming language in the Spyder IDE <sup>2</sup>, using  
289 the packages provided by the Anaconda distribution <sup>3</sup>. All packages were in the most up-to-date  
290 version. Packages used include SciKit-Learn [18], NumPy [21], SciPy [22], and NetworkX [23]. Unless  
291 otherwise specified, all the significance tests are non-parametric: given the small sample sizes and  
292 heterogeneous populations, normal distributions were not assumed. Wilcoxon Signed Rank test was  
293 used to compare drug conditions against their respective control conditions.

# 294 **3 Results**

## 295 **3.1 Temporal Algorithmic Complexity**

### 296 **3.1.1 Lempel-Ziv Compressibility**

297 The first measure of algorithmic complexity we used was normalized Lempel-Ziv compressibility  
298 [15, 16] of BOLD signals. We found significant differences between conditions in both Dataset  
299 A and Dataset B. In Dataset A, Kruskal-Wallis Analysis of Variance found significant differences  
300 between all three conditions ( $H(10.57)$ ,  $p=0.005$ ), and post-hoc analysis with Wilcoxon Signed-Rank  
301 test found significant differences between the Awake and Mild conditions ( $W(21)$ ,  $p=0.05$ ), Awake

---

<sup>2</sup><https://github.com/spyder-ide/spyder>

<sup>3</sup><https://www.anaconda.com/download>

302 and Moderate conditions ( $W(9)$ ,  $p=0.006$ ), and Mild and Moderate conditions ( $W(4)$ ,  $p=0.002$ ). In  
303 Dataset B, the Wilcoxon test found significant difference between the Awake and Deep conditions  
304 ( $H(19)$ ,  $p=0.011$ ). In both datasets, the Awake condition had the highest complexity, and as the  
305 depth of sedation increased, the associated LZC decreased. In Dataset A, the transition from Awake  
306 to Moderate showed  $\Delta = -0.029 \pm 0.027$ , and in Dataset B, the transition from Awake to Deep  
307 showed  $\Delta = -0.029 \pm 0.039$ . We note that these two results are remarkably similar, although this is  
308 likely a coincidence. For full results from Dataset A, see Table 1, and for Dataset B, Table 2. In  
309 the propofol sedation conditions of Dataset A (Mild and Moderate), we found significant negative  
310 correlations between LZC and serum concentrations of propofol ( $r=-0.55$ ,  $p=0.002$ ), see Figure 3A.

311 These results are consistent with previous findings that Lempel-Ziv compressibility of sponta-  
312 neous brain activity is discriminative of level of consciousness in humans [15, 16] and animals [24].

313 Of all the time-series measures described, the LZC algorithm described here is distinct in that  
314 it communicates information about the spatial complexity as well as the temporal complexity. This  
315 is because, unlike other measures like Sample Entropy or Higuchi Fractal Dimension which are  
316 calculated on 234 individual time-series and then averaged, LZC is calculated on an entire dataset,  
317 which has been flattened column-wise, as was done in [15, 16, 25], by "stacking" each column on top  
318 of the next, resulting in a one-dimensional vector where the first 234 elements are the first column,  
319 the second 234 elements are the second column, etc. This means that the vector  $V$  (see Methods  
320 section) can be divided into 234 segments where every entry corresponds to the coarse activation of  
321 a distinct brain region at the same time. The result is that each entry in the dictionary  $D$  created  
322 by the Lempel-Ziv algorithm corresponds, not to a series of samples from a single ROI, but rather  
323 a distribution of cortical regions that are "on" or "off."

### 324 **3.1.2 Sample Entropy**

325 We found significant decreases in the Sample Entropy of BOLD signals under anaesthesia in both  
326 Datasets A and B. In Dataset A, Kruskal-Wallis Analysis of Variance found a significant difference  
327 between all three conditions ( $H(12.94)$ ,  $p=0.002$ ) and post-hoc analysis with the Wilcoxon Signed-  
328 Rank test found significant differences between the Awake and Moderate conditions ( $W(6)$ ,  $p=0.004$ ),  
329 and Mild versus Moderate conditions ( $W(8)$ ,  $p=0.005$ ), but not the Awake versus Mild conditions.

330 In Dataset B there was a significant difference between the Awake and Deep conditions (W(21),  
331  $p=0.015$ ). As with the LZC analysis, the Awake condition had the highest Sample Entropy in  
332 both Datasets A and B, with the mean value decreasing with increasing sedation. In Dataset A,  
333 we observed  $\Delta = 0.036 \pm 0.035$  from Awake to Moderate, and in Dataset B we observed  $\Delta =$   
334  $-0.023 \pm 0.031$ . In the Mild and Moderate conditions of Dataset A, we found a significant negative  
335 correlation between serum concentration of propofol and Sample Entropy of BOLD signals ( $r=-0.53$ ,  
336  $p=0.003$ ).

337 These results are consistent with both the LZC results reported above and the findings of Ferentes  
338 et al., (2007), who found that Sample Entropy decreased with increasing sedation in much the same  
339 way that LZC does.

### 340 3.1.3 PCA of BOLD Signals

341 As with LZC, the PCA-based measure of BOLD signal complexity returns a measure of how com-  
342 pressible the set of data are as a proxy for complexity, by identifying the number of components  
343 required to explain a fixed proportion of the variance in the data. A larger number of components  
344 to explain the same amount of variance would indicate less compressibility of the data. Thus, we  
345 hypothesized that as level of sedation increased, so would the compressibility of BOLD signals,  
346 as measured by the number of components required to explain 95% of the variance. In Dataset  
347 A, Kruskal-Wallis analysis of variance found significant differences between all three conditions  
348 (H(8.13),  $p=0.017$ ), and post-hoc testing found significant differences between all three sets of con-  
349 ditions: Awake vs. Mild (W(9),  $p=0.03$ ), Awake vs. Moderate (W(6),  $p=0.016$ ), and Mild vs.  
350 Moderate (W(11),  $p=0.048$ ). In Dataset B, we found a significant difference between Awake and  
351 Deep (W(4),  $p=0.002$ ). As before, there was a consistent pattern of increasing mean compressibility  
352 (and a consequent decreasing number of required components) as sedation increased. In Dataset A,  
353  $\Delta = -2.214 \pm 2.73$  from Awake to Moderate, and in Dataset B,  $\Delta = -5.188 \pm 4.68$ . Here, the  $\Delta$  is  
354 negative because the number of components decreased between the Awake and sedated conditions,  
355 and is non-integer because it is the average over all subjects in the datasets. Of all the measures  
356 of BOLD signal compressibility, this was the only measure that did not significantly correlate with  
357 serum propofol concentration in the Mild and Moderate conditions in Dataset A.

358 As with LZC and the SampEn, these results indicate that as propofol-induced sedation increases,  
359 the algorithmic complexity of BOLD signals decreases. All measures of complexity discussed so far  
360 support each-other, despite being a variety of linear and non-linear algorithms.

## 361 **3.2 Temporal Process Complexity**

### 362 **3.2.1 Hurst Exponent**

363 The Hurst Exponent was the only measure that we hypothesized would increase as consciousness  
364 was lost, rather than decrease, since as a signal becomes more predictable, its Hurst Exponent tends  
365 towards unity [5]. In both Datasets A and B we found significant differences between conditions. In  
366 Dataset A, Kruskal-Wallis Analysis of Variance found an omnibus difference ( $H(9.11)$ ,  $p=0.01$ ), and  
367 post-hoc testing found significant differences between Awake and Mild ( $W(16)$ ,  $p=0.022$ ), Awake  
368 and Moderate ( $W(8)$ ,  $p=0.005$ ), and Mild and Moderate ( $W(17)$ ,  $p=0.026$ ). In Dataset B, we found  
369 significant differences between the Awake and Deep conditions ( $W(26)$ ,  $p=0.02$ ). Unlike the previous  
370 two metrics, and as we expected, we found a relative increase in the Hurst Exponent as sedation  
371 increased: in Dataset A, we found  $\Delta = 0.014 \pm 0.014$  from Awake to Moderate sedation, and in  
372 Dataset B we found  $\Delta = 0.01 \pm 0.016$  from Awake to Deep sedation. In Dataset A, we found a  
373 significant correlation between serum concentration of propofol and Hurst Exponent in the Mild and  
374 Moderate sedation conditions ( $r=0.393$ ,  $p=0.039$ ).

375 This is consistent with our initial hypothesis that as sedation increased and consciousness was lost,  
376 the BOLD signals would become more predictable, as measured by an increasing Hurst Exponent.

### 377 **3.2.2 Higuchi Fractal Dimension**

378 The Higuchi Fractal Dimension was one of the least sensitive measures of BOLD signal complex-  
379 ity sampled here. In Dataset A, Kruskal-Wallis Analysis of Variance found a significant difference  
380 between all three conditions ( $H(8.27)$ ,  $p=0.016$ ), and post-hoc analysis found significant differences  
381 between the Awake and Moderate conditions ( $W(15)$ ,  $p=0.019$ ) and the Mild and Moderate condi-  
382 tions ( $W(17)$ ,  $p=0.026$ ), but not the Awake and Mild conditions. In Dataset B we found a significant  
383 difference between the Awake and Deep conditions ( $W(23)$ ,  $p=0.02$ ). As with LZC and Sample En-



384 tropy, the Awake condition had the highest mean fractal dimension in both samples, which went  
385 down as sedation increased: in Dataset A  $\Delta = -0.024 \pm 0.032$  from Awake to Moderate and in  
386 Dataset B,  $\Delta = -0.018 \pm 0.027$  from Awake to Deep. Surprisingly, the Higuchi Fractal dimen-  
387 sion showed a very strong negative correlation with serum propofol concentration in the Mild and  
388 Moderate conditions of Dataset A ( $r=-0.614$ ,  $p=0.0005$ ).

389 The finding that Higuchi Fractal dimension was relatively less able to discriminate between level  
390 of consciousness than LZC or Sample Entropy but more predictive of serum propofol concentration  
391 is interesting. While it is hard to come up with a definitive interpretation, it may suggest that there  
392 is some variable factor in individuals that makes their level of consciousness more or less resistant  
393 to the changes in brain activity (as measured by Higuchi Fractal Dimension) induced by propofol,  
394 or that the plasma concentration data offer more resolution, extending beyond the three artificially  
395 imposed bins of Awake, Mild and Moderate sedation.

### 396 **3.3 Topological Algorithmic Complexity**

#### 397 **3.3.1 Algebraic Connectivity**

398 Our first of two measures of functional network complexity is algebraic connectivity, which returns  
399 information about the robustness of the network to removal of elements [26]. In Dataset A, Kruskal-  
400 Wallis analysis found a significant difference in algebraic connectivity between all three conditions  
401 ( $H(9.654)$ ,  $p=0.008$ ). Post-hoc analysis found significant differences between the Awake and Mod-  
402 erate conditions ( $W(12)$ ,  $p=0.011$ ) and the Mild and Moderate conditions ( $W(15)$ ,  $p=0.019$ ), but  
403 not the Awake versus Mild conditions. In Dataset B, we found a significant difference between the  
404 Awake and Deep conditions ( $W(23)$ ,  $p=0.02$ ). As before, in Datasets A and B the Awake condition  
405 had the highest mean algebraic connectivity, with mean values dropping as sedation increased. In  
406 Dataset A,  $\Delta = -107.67 \pm 116.98$  from Awake to Moderate, while in Dataset B,  $-906.09 \pm 1235.07$ .  
407 Despite the ability of algebraic connectivity to discriminate between conditions, there was no signif-  
408 icant correlation with serum propofol concentration in the Mild and Moderate conditions of Dataset  
409 A.

410 These results suggest that, while graph theoretical measures may be predictive of level of con-

411 consciousness in propofol anaesthesia, algebraic connectivity in particular seems to lack the discrimi-  
412 native power of direct analysis on BOLD signals. Nevertheless, these results are promising as they  
413 show that the topological complexity of functional brain networks can communicate information  
414 relevant to the level of consciousness of an individual.

### 415 **3.4 Topological Process Complexity**

#### 416 **3.4.1 Graph Lempel-Ziv Compressibility**

417 The final metric we tested, and the second measure of topological complexity, was the compressibility  
418 of functional connectivity adjacency matrices using the Lempel-Ziv algorithm. This was the weakest  
419 of all the measures explored: the only significant difference was in Dataset A, between the Awake  
420 and Moderate conditions ( $W(11)$ ,  $p=0.009$ ), although in Dataset B there was a similar trend that  
421 approached, but did not reach significance ( $W(32)$ ,  $0.06$ ). The general trend of Awake having the  
422 highest value which decreased under increasing sedation was conserved (although note the large  
423 standard deviations): in Dataset A  $\Delta = -2885.71 \pm 4937.34$  and in Dataset B  $\Delta = -4923.44 \pm$   
424  $8967.29$ . There was no significant correlation between graph compressibility and serum propofol  
425 concentrations in Dataset A.

426 While this is clearly the weakest result, in the context of the others, we still find its success at  
427 discriminating between the Awake and Moderate conditions of Dataset A intriguing, and suspect  
428 that in a larger set of data it may have more discriminative power. The relationship between  
429 consciousness and network compressibility may not be as direct as when performing analysis such  
430 as LZC on BOLD signals, but these results suggest this is an area worth exploring.

### 431 **3.5 Higher Order Analysis of Overall Complexity**

432 Every metric, when correlated against every other metric, showed a highly significant correlation  
433 (see Figure 2), all of which were significant with the sole exception of the correlation between the  
434 number of PCA components required to explain the majority of the variance and the Hurst expo-  
435 nent in Dataset A. We had hypothesized that, if the different kinds of complexity explored here  
436 (algorithmic and process-based, in both the temporal and topological dimensions) all were ways to

437 quantify an underlying construct of overall complexity, then there should be a single component  
438 that explains the majority of the variance of the results. In Dataset A, we found that the principal  
439 component explained 67.07% of the variance in the set of results and in Dataset B the principal  
440 component explained 71.05% of the variance of the results. In both datasets, this component corre-  
441 lated extremely highly with each metric: in Dataset A it correlated most highly with LZC ( $r=-0.947$ ,  
442  $p \leq 1 \times 10^{-5}$ ), followed by Sample Entropy ( $r=-0.929$ ,  $p \leq 1 \times 10^{-5}$ ). In Dataset B, these two were  
443 also the most highly correlated with the principal component, although the order was flipped, with  
444 Sample Entropy having the highest correlation ( $r=-0.95$ ,  $p \leq 1 \times 10^{-5}$ ), followed by LZC ( $r=-0.932$ ,  
445  $p \leq 1 \times 10^{-5}$ ). When broken down by condition, in both Datasets, the principal component was  
446 able to discriminate between states of consciousness: in Dataset A the Kruskal-Wallis test found a  
447 significant difference between all three conditions ( $H(12.048, p=0.002)$ ), and post-hoc testing found  
448 significant differences between the Awake and Moderate conditions ( $W(8), p=0.005$ ), and the Mild  
449 and Moderate conditions ( $W(3), p=0.001$ ) but not the Awake and Mild conditions. In Dataset B  
450 we found a significant difference between the Awake and Deep conditions ( $W(8), p=0.002$ ). In the  
451 Mild and Moderate conditions of Dataset A, the principal component significantly correlated with  
452 serum concentrations of propofol ( $r=0.531, p=0.004$ ). Thus, the principal component derived from  
453 multiple specific measures of complexity can be related to states of consciousness in the human  
454 brain, and may be identified with the overall complexity of the dataset.

## 455 **4 Discussion**

456 In the present work, we have investigated measures of complexity from algorithmic information  
457 theory and the physics of dynamical systems, as they apply to the temporal and topological (network)  
458 dimensions of functional MRI brain data from individuals under different levels of propofol sedation.  
459 Two main insights can be derived from our results. The first is that, at least in the context of  
460 the human brain, different measures purporting to quantify complexity are indeed related to some  
461 underlying common construct, regardless of the dimension along which they measure complexity,  
462 or the aspect of complexity that they measure. This provides much-needed validation to the idea  
463 that a dataset - and the system from which it derives - can be considered complex *tout court*,

464 rather than just being complex in a specific dimension, and according to a specific way of assessing  
465 complexity. We term this the overall complexity of the system or dataset. In turn, this suggests  
466 that it is appropriate to use the term complexity for the various specific measures, because there  
467 does seem to exist a common underlying property of the data that they tap into. In particular, we  
468 have demonstrated that the complexity of the human brain activity, as inferred from fMRI BOLD  
469 signals, is modulated by one's state of consciousness. This was observed both with the individual  
470 measures - validating and extending previous results - and, most importantly, with the underlying  
471 construct of overall complexity, which demonstrates its validity as a construct. The latter is also  
472 reinforced by the fact that we were able to replicate this finding with a separate dataset.

473 Secondly, it is important to observe that different complexity measures, though correlated to each  
474 other and related to the same underlying construct of overall complexity, are nevertheless sensitive  
475 to different aspects of the data. In particular, measures operating along the temporal dimension  
476 appeared especially sensitive at discriminating between levels of sedation; conversely, topological  
477 measures failed to discriminate between Awake and Mild conditions in Dataset A, and also did  
478 not correlate with propofol serum levels. This suggests that the temporal dimension of the human  
479 brain's complexity, as derived from BOLD signal timeseries (despite their limited temporal resolution  
480 compared to EEG), may be especially vulnerable to loss of consciousness, at least as it is induced  
481 by the GABA-ergic agent propofol. Further work may seek to identify whether this effect is uniform  
482 across cortical regions, or whether specific areas' timeseries are more largely affected by propofol  
483 than others. This represents a novel insight regarding the ways in which anaesthetic drugs such as  
484 propofol intervene on the brain to cause unconsciousness. Additionally, it would be worth exploring  
485 whether this observation of different sensitivity of temporal and topological measures of complexity  
486 is drug-specific, or if instead it is a generalisable feature of how the brain loses consciousness. Thus,  
487 one future direction of research is to apply these same metrics to states of consciousness induced by  
488 different anaesthetic agents, whose molecular mechanisms of action can vary widely. Disorders of  
489 consciousness (DOC) due to severe brain injury may also represent a crucial future step for research:  
490 unlike anaesthetics, DOC involve changes in the physical structure of the brain, which is bound to  
491 impact the topology of brain networks. Investigating how this impacts the relation between different  
492 measures and dimensions of complexity will provide further understanding into the relation between

493 complexity and consciousness in the brain. Additionally, as MRI is already a routine part of care for  
494 DOC patients, algorithms such as those explored here might be helpful in determining the presence  
495 or absence of consciousness in ambiguous states such as minimally conscious state.

496 Importantly, our results also show that, despite the relative temporal paucity of information in  
497 BOLD signals, these signals carry sufficient information to discriminate between states of conscious-  
498 ness. While preliminary, these findings suggest that the process complexity of individual BOLD  
499 signals is at least partially re-encoded as topological complexity when forming functional connec-  
500 tivity networks. One possible avenue of future work is to explore the parameters under which  
501 this conservation of complexity is maximized (different similarity functions, different thresholding  
502 procedures, etc), in order to increase the sensitivity of these measures. Crucially, even higher dis-  
503 criminative power may be achieved by applying the same analyses to measures with higher temporal  
504 information, such as EEG, which may then improve anaesthetists' ability to detect unwanted resid-  
505 ual consciousness in patients, thereby avoiding the rare but extremely distressing condition known  
506 as intraoperative awareness [27].

507 Nevertheless, our work also presents a number of limitations, and these should be borne in  
508 mind when evaluating the present results. Firstly, as already mentioned the temporal information  
509 available in the BOLD signal is limited, and it is also not a direct measure of neural activity.  
510 Additionally, our analysis pipeline involved removing the negative correlations between brain regions,  
511 before the network analysis. While negative correlations are unclear in origin and interpretation, and  
512 removing them is the most common approach, it is known that they are altered during anaesthesia  
513 and other states of unconsciousness [28, 29, 30]; thus, ignoring them may have different effects  
514 on conscious versus unconscious brain networks, which could explain the reduced sensitivity of  
515 topological measures. Thirdly, in Dataset A the state of consciousness was determined based on the  
516 estimated propofol concentration, rather than behaviour, so that different individuals' susceptibility  
517 to the drug may have led to different levels of sedation, despite the same level of propofol. However,  
518 this concern is mitigated by the replication of our results in Dataset B, where sedation was deeper and  
519 it was assessed behaviourally, so that all individuals met the same criteria. Finally, the measures  
520 of complexity explored here are but a subset of those that have been proposed over the years in  
521 the literature. Future research could benefit from expanding this repertoire, for instance including

522 estimates of Phi, a measure of integrated information derived from neural complexity [10], which  
523 has been proposed to quantify a system's consciousness [9, 31]

## 524 **5 Conclusion**

525 We have investigated measures of algorithmic and process complexity of fMRI BOLD signal in both  
526 the temporal and topological dimensions, at various levels of consciousness induced by propofol  
527 sedation. Our results demonstrate that complexity measures are differently able to discriminate  
528 between levels of sedation, with temporal measures showing higher sensitivity. Additionally, all  
529 measures were strongly correlated, and most of the variance could be explained by a single underlying  
530 construct, which may be interpreted as a more general quantification of complexity, and which  
531 also proved capable of discriminating between levels of sedation, demonstrating a relation between  
532 consciousness and complexity.

## 533 **Acknowledgements**

534 This work was supported by a grant from the Wellcome Trust: Clinical Research Training Fel-  
535 lowship to Ram Adapa (Contract grant number: 083660/Z/07/Z); from the Canada Excellence  
536 Research Chairs program (215063) and the Canadian Institute for Advanced research (CIFAR)[to  
537 AMO]; Cambridge Biomedical Research Centre and NIHR Senior Investigator Awards [to DKM], the  
538 Stephen Erskine Fellowship at Queens College, Cambridge [to EAS], the LOral-Unesco for Women  
539 in Science Excellence Research Fellowship [to LN]; the British Oxygen Professorship of the Royal  
540 College of Anaesthetists [to DKM] and the Gates Cambridge Trust [to AIL]. I Pappas received  
541 funding from the Oon Khye Beng Ch'Hia Tsio Studentship for Research in Preventive Medicine, ad-  
542 ministered via Downing College, University of Cambridge; The research was also supported by the  
543 NIHR Brain Injury Healthcare Technology Co-operative based at Cambridge University Hospitals  
544 NHS Foundation Trust and University of Cambridge. We would like to thank Victoria Lupson and  
545 the staff in the Wolfson Brain Imaging Centre (WBIC) at Addenbrookes Hospital for their assistance  
546 in scanning. We would like to thank Dian Lu and Olaf Sporns for useful discussions, and all the

547 participants for their contribution to this study.

## 548 **References**

- 549 [1] James P Crutchfield. Between order and chaos. *Nature Physics*, 8(1):17, 2012.
- 550 [2] Gregory J. Chaitin. On the Simplicity and Speed of Programs for Computing Infinite Sets of  
551 Natural Numbers. *J. ACM*, 16(3):407–422, July 1969.
- 552 [3] J. S. Richman and J. R. Moorman. Physiological time-series analysis using approximate en-  
553 tropy and sample entropy. *American Journal of Physiology. Heart and Circulatory Physiology*,  
554 278(6):H2039–2049, June 2000.
- 555 [4] Ljupco Kocarev and Gbor Vattay. Synchronization in Complex Networks. In Ljupco Kocarev  
556 and Gbor Vattay, editors, *Complex Dynamics in Communication Networks*, Understanding  
557 Complex Systems, pages 309–328. Springer Berlin Heidelberg, Berlin, Heidelberg, 2005.
- 558 [5] H. E. Hurst. Long-Term Storage Capacity of Reservoirs. *Transactions of the American Society  
559 of Civil Engineers*, 116(1):770–799, 1951.
- 560 [6] T. Higuchi. Approach to an irregular time series on the basis of the fractal theory. *Physica D:  
561 Nonlinear Phenomena*, 31(2):277–283, June 1988.
- 562 [7] Robin Lester Carhart-Harris, Robert Leech, Peter John Hellyer, Murray Shanahan, Amanda  
563 Feilding, Enzo Tagliazucchi, Dante R Chialvo, and David Nutt. The entropic brain: a theory of  
564 conscious states informed by neuroimaging research with psychedelic drugs. *Frontiers in human  
565 neuroscience*, 8:20, 2014.
- 566 [8] Robin L Carhart-Harris. The entropic brain-revisited. *Neuropharmacology*, 2018.
- 567 [9] Giulio Tononi. An information integration theory of consciousness. *BMC neuroscience*, 5(1):42,  
568 2004.

- 569 [10] Giulio Tononi, Olaf Sporns, and Gerald M Edelman. A measure for brain complexity: relating  
570 functional segregation and integration in the nervous system. *Proceedings of the National  
571 Academy of Sciences*, 91(11):5033–5037, 1994.
- 572 [11] Emmanuel A. Stamatakis, Ram M. Adapa, Anthony R. Absalom, and David K. Menon. Changes  
573 in Resting Neural Connectivity during Propofol Sedation. *PLOS ONE*, 5(12):e14224, December  
574 2010.
- 575 [12] Susan Whitfield-Gabrieli and Alfonso Nieto-Castanon. Conn: a functional connectivity toolbox  
576 for correlated and anticorrelated brain networks. *Brain Connectivity*, 2(3):125–141, 2012.
- 577 [13] Yashar Behzadi, Khaled Restom, Joy Liau, and Thomas T. Liu. A component based noise  
578 correction method (CompCor) for BOLD and perfusion based fMRI. *NeuroImage*, 37(1):90–  
579 101, August 2007.
- 580 [14] Michael D. Fox, Abraham Z. Snyder, Justin L. Vincent, Maurizio Corbetta, David C. Van Essen,  
581 and Marcus E. Raichle. The human brain is intrinsically organized into dynamic, anticorrelated  
582 functional networks. *Proceedings of the National Academy of Sciences of the United States of  
583 America*, 102(27):9673–9678, July 2005.
- 584 [15] Michael Schartner, Anil Seth, Quentin Noirhomme, Melanie Boly, Marie-Aurelie Bruno, Steven  
585 Laureys, and Adam Barrett. Complexity of Multi-Dimensional Spontaneous EEG Decreases  
586 during Propofol Induced General Anaesthesia. *PLOS ONE*, 10(8):e0133532, August 2015.
- 587 [16] Michael M. Schartner, Andrea Pigorini, Steve A. Gibbs, Gabriele Arnulfo, Simone Sarasso,  
588 Lionel Barnett, Lino Nobili, Marcello Massimini, Anil K. Seth, and Adam B. Barrett. Global  
589 and local complexity of intracranial EEG decreases during NREM sleep. *Neuroscience of Con-  
590 sciousness*, 3(1), January 2017.
- 591 [17] Srdjan Kesi and Sladjana Z. Spasi. Application of Higuchi’s fractal dimension from basic to  
592 clinical neurophysiology: A review. *Computer Methods and Programs in Biomedicine*, 133:55–  
593 70, September 2016.



- 594 [18] Fabian Pedregosa, Gal Varoquaux, Alexandre Gramfort, Vincent Michel, Bertrand Thirion,  
595 Olivier Grisel, Mathieu Blondel, Peter Prettenhofer, Ron Weiss, Vincent Dubourg, Jake Van-  
596 derplas, Alexandre Passos, David Cournapeau, Matthieu Brucher, Matthieu Perrot, and douard  
597 Duchesnay. Scikit-learn: Machine Learning in Python. *Journal of Machine Learning Research*,  
598 12:28252830, October 2011.
- 599 [19] Alessandro Daducci, Stephan Gerhard, Alessandra Griffa, Alia Lemkaddem, Leila Cammoun,  
600 Xavier Gigandet, Reto Meuli, Patric Hagmann, and Jean-Philippe Thiran. The Connectome  
601 Mapper: An Open-Source Processing Pipeline to Map Connectomes with MRI. *PLOS ONE*,  
602 7(12):e48121, December 2012.
- 603 [20] Y. Kuramoto. *Chemical Oscillations, Waves, and Turbulence*. Springer Series in Synergetics.  
604 Springer-Verlag, Berlin Heidelberg, 1984.
- 605 [21] Stfan van der Walt, S. Chris Colbert, and Gal Varoquaux. The NumPy Array: A Structure for  
606 Efficient Numerical Computation. *Computing in Science & Engineering*, 13(2):22–30, March  
607 2011.
- 608 [22] Eric Jones, Travis Oliphant, and Pearu Peterson. SciPy: Open Source Scientific Tools for  
609 Python. January 2001.
- 610 [23] Aric Hagberg, Daniel Schult, and Pieter Swart. Exploring Network Structure, Dynamics, and  
611 Function using NetworkX. 2008.
- 612 [24] Anthony G. Hudetz, Xiping Liu, Siveshigan Pillay, Melanie Boly, and Giulio Tononi. Propofol  
613 anesthesia reduces Lempel-Ziv complexity of spontaneous brain activity in rats. *Neuroscience*  
614 *Letters*, 628:132–135, August 2016.
- 615 [25] Michael M. Schartner, Robin L. Carhart-Harris, Adam B. Barrett, Anil K. Seth, and Suresh D.  
616 Muthukumaraswamy. Increased spontaneous MEG signal diversity for psychoactive doses of  
617 ketamine, LSD and psilocybin. *Scientific Reports*, 7:46421, April 2017.
- 618 [26] Reinhard Diestel. *Graph Theory*. Graduate Texts in Mathematics. Springer-Verlag, Berlin  
619 Heidelberg, 5 edition, 2017.

- 620 [27] Beverley A Orser. Depth-of-anesthesia monitor and the frequency of intraoperative awareness,  
621 2008.
- 622 [28] Altered local coherence in the default mode network due to sevoflurane anesthesia. *Brain*  
623 *research*, 1318:110–21, mar 2010.
- 624 [29] Pierre Boveroux, Audrey Vanhaudenhuyse, and Christophe Phillips. Breakdown of within- and  
625 between-network Resting State during Propofol-induced Loss of Consciousness. *Anesthesiology*,  
626 113(5):1038–1053, 2010.
- 627 [30] Carol Di Perri, Mohamed Ali Bahri, Enrico Amico, Aurore Thibaut, Lizette Heine, Georgios  
628 Antonopoulos, Vanessa Charland-Verville, Sarah Wannez, Francisco Gomez, Roland Hustinx,  
629 Luaba Tshibanda, Athena Demertzi, Andrea Soddu, and Steven Laureys. Neural correlates of  
630 consciousness in patients who have emerged from a minimally conscious state: a cross-sectional  
631 multimodal imaging study. *The Lancet. Neurology*, 15(8):830–842, 2016.
- 632 [31] Max Tegmark. Improved Measures of Integrated Information. *PLoS Computational Biology*,  
633 12(11), 2016.

|          | $LZ_C$            | SampEnt           | PCA                | Hurst             | Higuchi           | AlgConn              | $LZ_{Graph}$              | Serum Piv |
|----------|-------------------|-------------------|--------------------|-------------------|-------------------|----------------------|---------------------------|-----------|
| Awake    | $0.967 \pm 0.013$ | $0.662 \pm 0.013$ | $28.5 \pm 7.771$   | $0.764 \pm 0.009$ | $0.867 \pm 0.015$ | $470.433 \pm 73.893$ | $375316.786 \pm 4256.981$ | N/A       |
| Mild     | $0.962 \pm 0.012$ | $0.654 \pm 0.01$  | $27.429 \pm 7.5$   | $0.769 \pm 0.008$ | $0.864 \pm 0.013$ | $436.068 \pm 70.707$ | $375353.214 \pm 3931.755$ | $286.025$ |
| Moderate | $0.939 \pm 0.028$ | $0.626 \pm 0.035$ | $26.286 \pm 7.314$ | $0.778 \pm 0.013$ | $0.842 \pm 0.025$ | $362.762 \pm 85.815$ | $372431.071 \pm 4277.4$   | $626.126$ |

Table 1: The values for all the complexity measures, temporal and spatial, for Dataset A.

|       | $LZ_C$            | SampEnt           | PCA                | Hurst             | Higuchi           | AlgConn                 | $LZ_{Graph}$              |
|-------|-------------------|-------------------|--------------------|-------------------|-------------------|-------------------------|---------------------------|
| Awake | $0.967 \pm 0.018$ | $0.659 \pm 0.017$ | $45.812 \pm 2.744$ | $0.738 \pm 0.008$ | $0.981 \pm 0.011$ | $4693.704 \pm 826.809$  | $372236.562 \pm 3794.728$ |
| Deep  | $0.938 \pm 0.05$  | $0.636 \pm 0.038$ | $40.625 \pm 4.702$ | $0.749 \pm 0.016$ | $0.963 \pm 0.03$  | $3787.616 \pm 1338.374$ | $367313.125 \pm 8565.381$ |

Table 2: The values for all the complexity measures, temporal and spatial, for Dataset B.

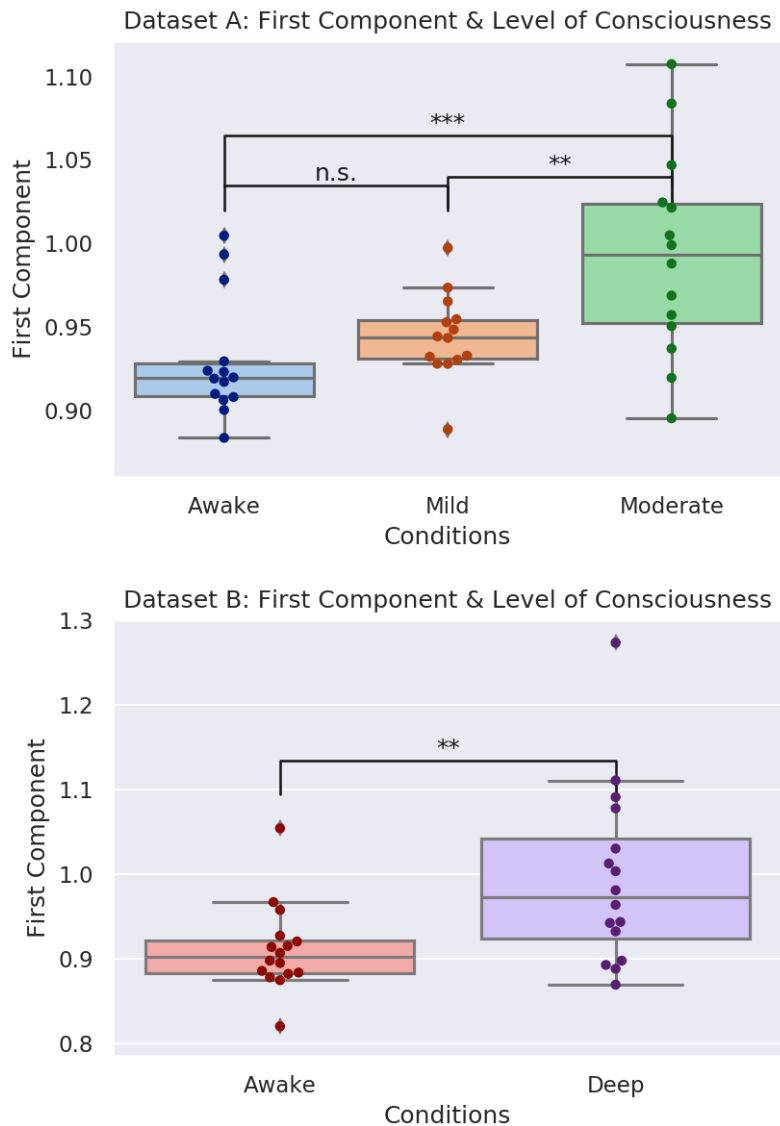

Figure 1: Here are the differences in the first principal component generated from all the measures from Datasets A and B. Interestingly, in Dataset A, there was no significant difference between the Awake and Mild condition, while there were differences between both of those states and the Moderate condition. While this may be a reflection of lack of sensitivity, it is worth noting that, between the Awake and Mild conditions, consciousness was not actually lost: volunteers experienced conscious sedation, while the difference in level of consciousness between the Awake and Moderate conditions was much more dramatic. In Dataset B, where consciousness was fully lost in the Deep condition, a significant difference appeared. Note that, despite the measures of complexity generally dropping as consciousness was lost (with the notable exception of the Hurst exponent analysis), the PCA analysis returned a Hurst-like pattern, with the values in the component increasing as consciousness is lost. This does not indicate an increase in complexity in any sense, but rather, is an artefact of how the dimensionality reduction transforms values. To ensure that this was not being driven by the Hurst exponent in any way, we ran the analysis after multiplying each Hurst exponent by -1 (so that the value decreased with loss of consciousness), and found no difference in the result.

## Correlation Matrices

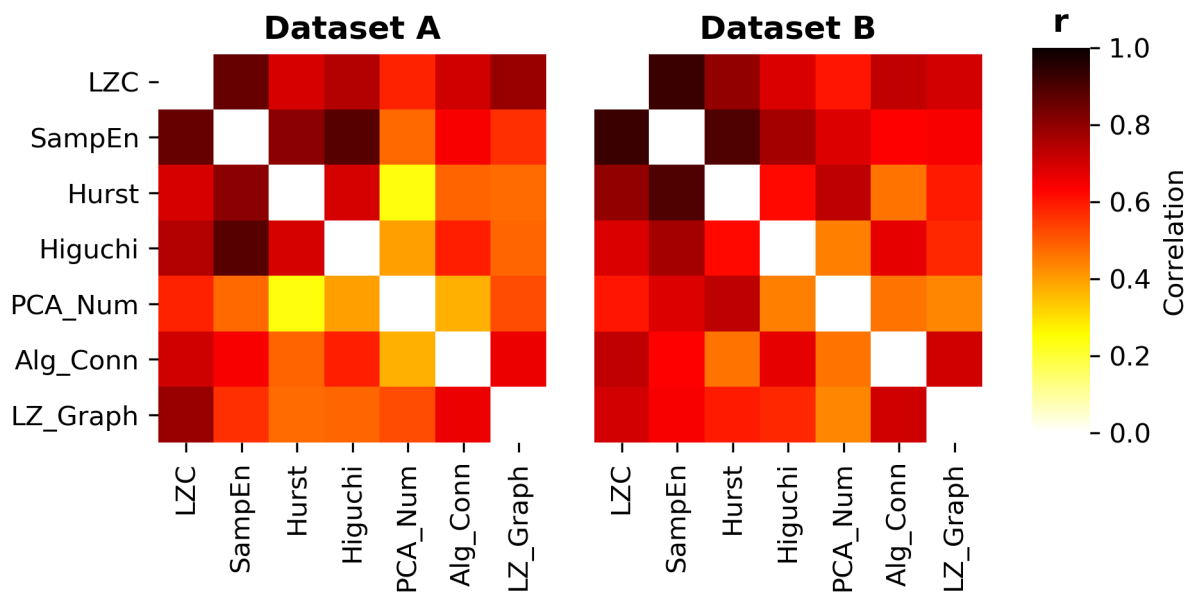

Figure 2: The correlation matrices between all the different metrics from Datasets A and B. All entries along the diagonal have been removed. There are some typical patterns: the graph measures (LZ\_Graph and Algebraic Connectivity) are both generally more highly correlated, as are LZC, SampEn and Hurst). With the exception of a single correlation between the PCA Number and the Hurst Exponent in Dataset A. The p-values ranged over many orders of magnitude from  $10^{-2}$  to  $10^{-20}$

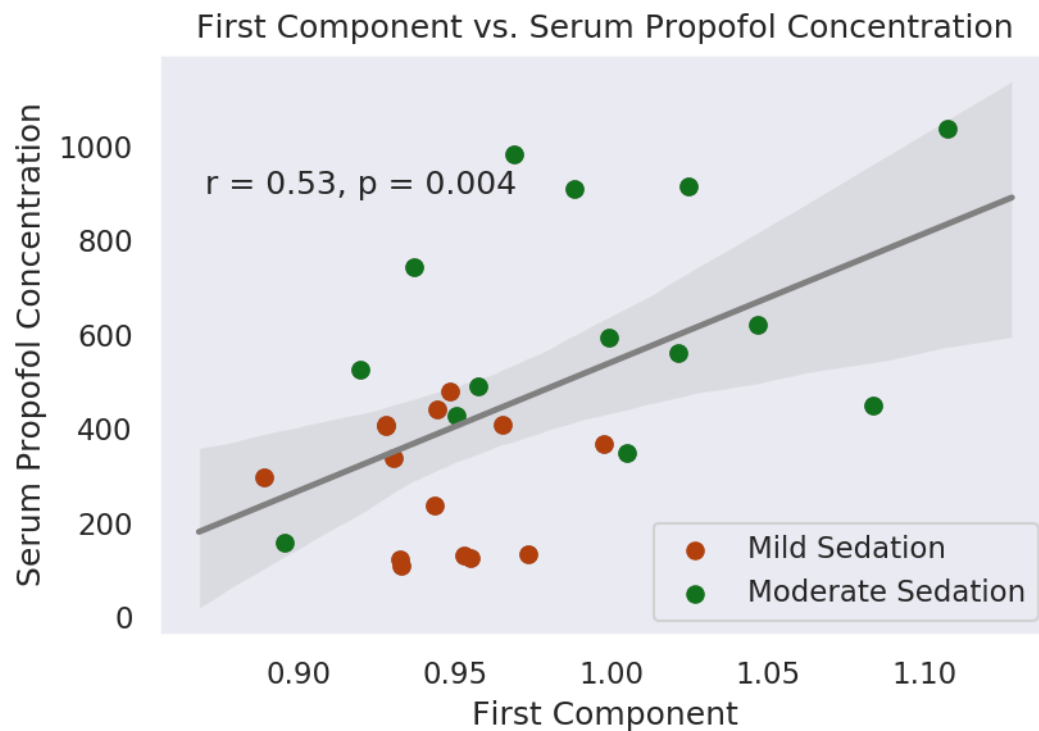

Figure 3: There was a significant correlation between the first component and serum concentration of propofol, with patients in the Mild condition ( $r = 0.53$ ,  $p$ -value = 0.004) clustering together with low concentrations, and increasing, with larger variances, as the propofol concentration climbs. As with the plots shown above, the incongruous increase in the values of the component does not reflect a relative increase in complexity in this case, but is an artefact of the PCA algorithm. No Awake volunteers were included in this analysis, as all would have had a blood propofol concentration of exactly zero.
